# Supplementary figures and images for: Relationships between Urine Albumin Excretion and Dietary Habits in Patients with Type 2 Diabetes
Source: Preprints.org preprint supplement (doi:10.20944/preprints201907.0092.v1), 2019-07-08

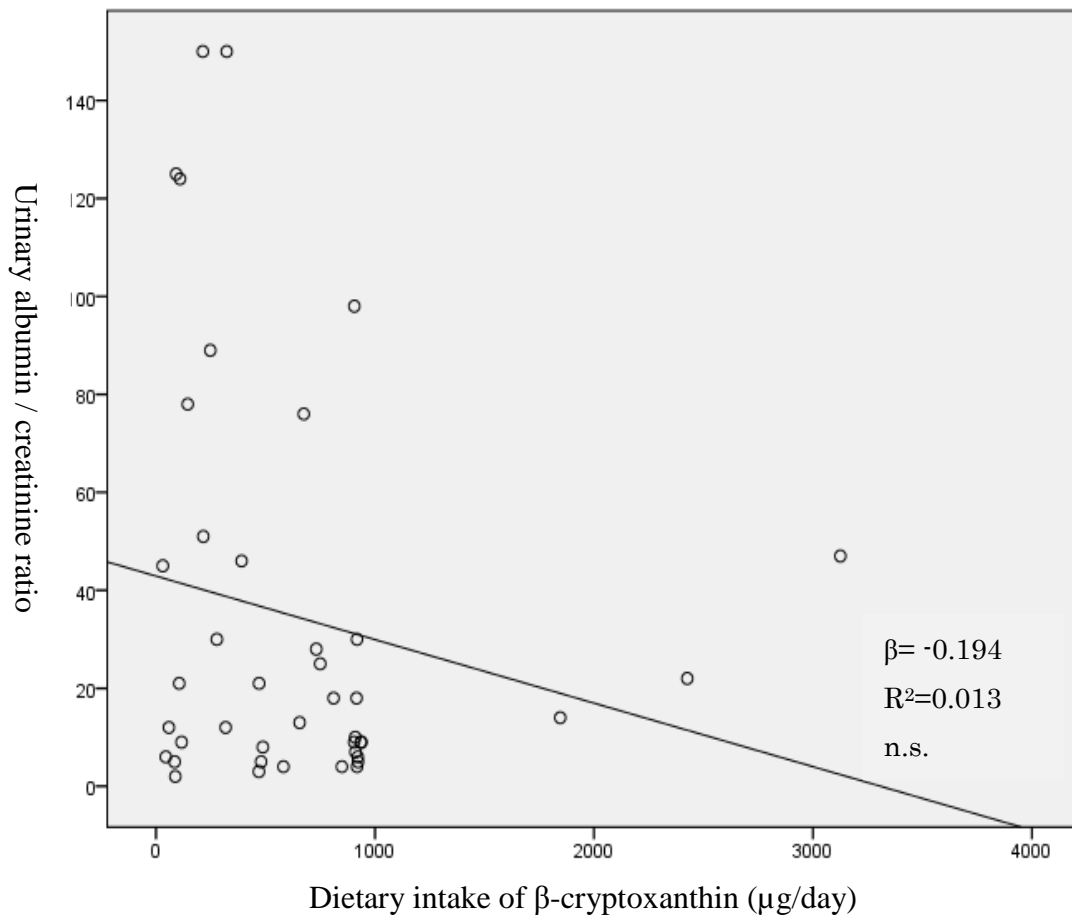

$\beta$ -Cryptoxanthin ( $\mu\text{g}/\text{day}$ )

Supplement: Supplementary file 1 [file supplementary]
